# Supplementary material for: Antibacterial Potential of Extracts and Phytoconstituents Isolated from Syncarpia hillii Leaves In Vitro
Source: MDPI journal article supplement (doi:10.3390/plants11030283), 2022-01-21
Supplement: s1 [file s1]

# Antibacterial potential of extracts and phytoconstituents isolated from *Syncarpia hillii* leaves *in vitro*

Muthukuttige M.N. Perera<sup>1</sup>, Satish N. Dighe<sup>2\*</sup>, Peter L. Katavic<sup>1</sup>, and Trudi A. Collet<sup>1\*</sup>

<sup>1</sup>Innovative Medicines Group, Queensland University of Technology, Faculty of Health, 60 Musk Avenue, Kelvin Grove, QLD, Australia 4059

\*Correspondence: sdighe2008@gmail.com; t.collet@qut.edu.au

## 1) Figures

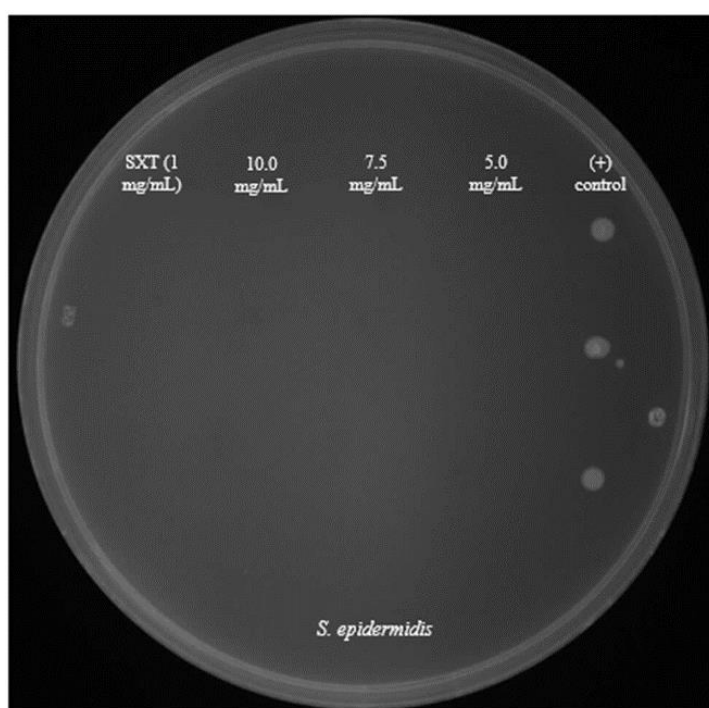

**Figure S1.** MBC assay for *S. hillii* methanol extract against *Staphylococcus epidermidis*. *S. hillii* methanol extract exhibited bactericidal effects against the bacterium at 5.0 mg/mL. Mueller-Hinton (MH) agar plate layout: 2  $\mu$ L of 1 mg/mL SXT (Trimethoprim + Sulfamethoxazole), *S. hillii* extract (MBC at 5 mg/mL) and positive control (*S. epidermidis* in MH broth) in triplicate were placed onto the surface of a sterile MH agar plate.

### I) NMR spectra of Quercetin-3-O- $\beta$ -D-glucuronide

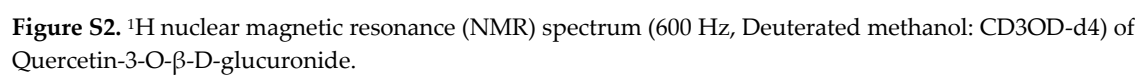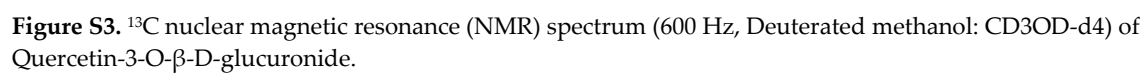

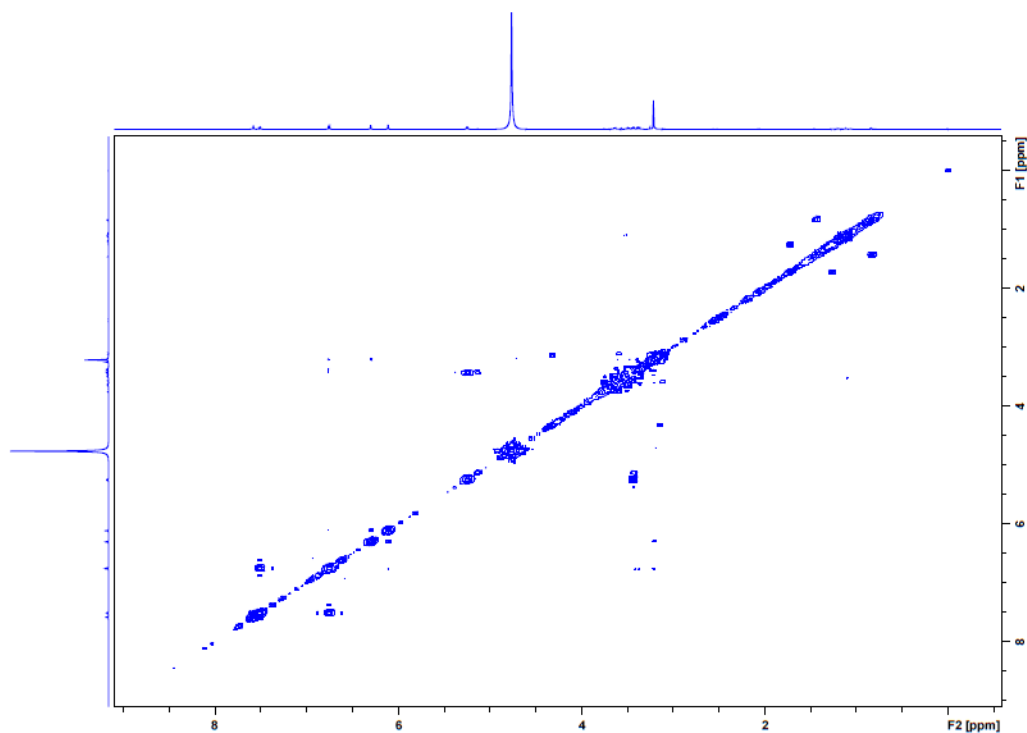

**Figure S4.** Two-dimensional nuclear magnetic resonance spectroscopy: correlated spectroscopy (COSY) spectrum (600 Hz, Deuterated methanol: CD<sub>3</sub>OD-d<sub>4</sub>) of Quercetin-3-O-β-D-glucuronide.

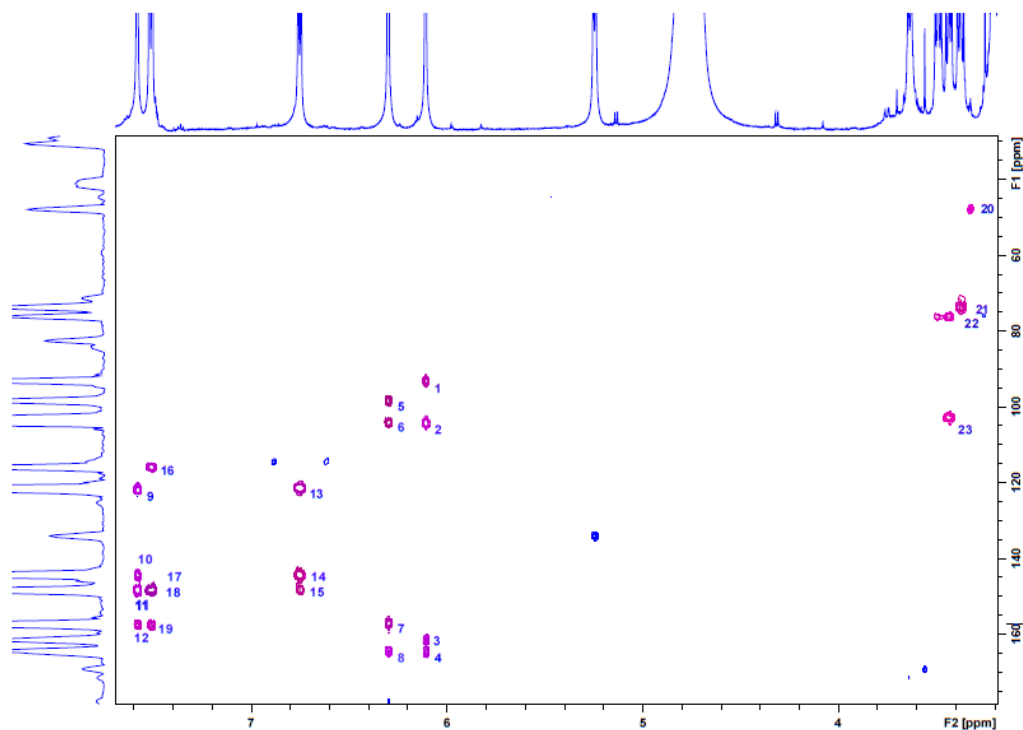

**Figure S5.** Two-dimensional nuclear magnetic resonance spectroscopy: heteronuclear multiple bond correlation (HMBC) spectrum (600 Hz, Deuterated methanol: CD<sub>3</sub>OD-d<sub>4</sub>) of Quercetin-3-O-β-D-glucuronide.

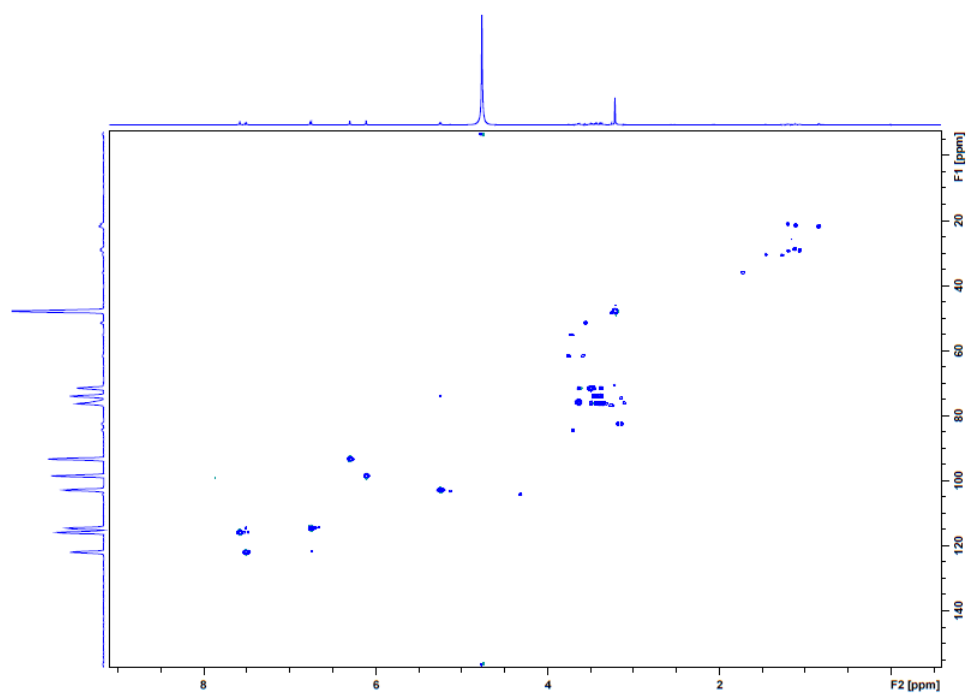

**Figure S6.** Two-dimensional nuclear magnetic resonance spectroscopy: heteronuclear single quantum correlation (HSQC) spectrum (600 Hz, Deuterated methanol: CD<sub>3</sub>OD-d<sub>4</sub>) of Quercetin-3-O-β-D-glucuronide.

## II) Mass spectra of Quercetin-3-O-β-D-glucuronide

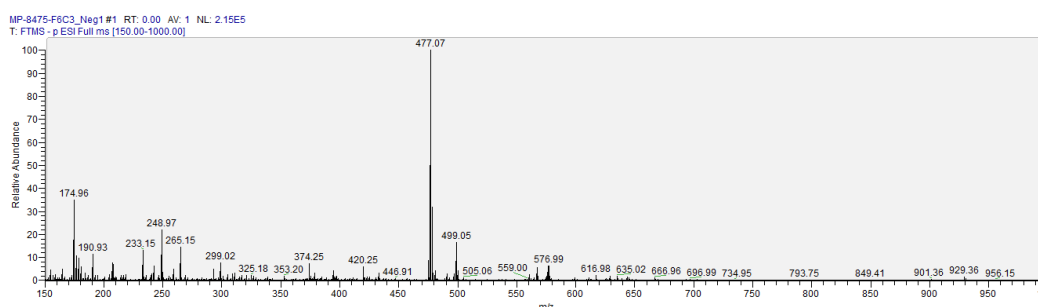

**Figure S7.** Mass spectrum (MS) in negative ion mode ( $m/z$  150–1000, scan rate of 0.5 Hz, voltage 2.0 kV) of Quercetin-3-O-β-D-glucuronide.

### 3) Spectroscopic data for Shikimic acid

#### I) NMR spectra of Shikimic acid

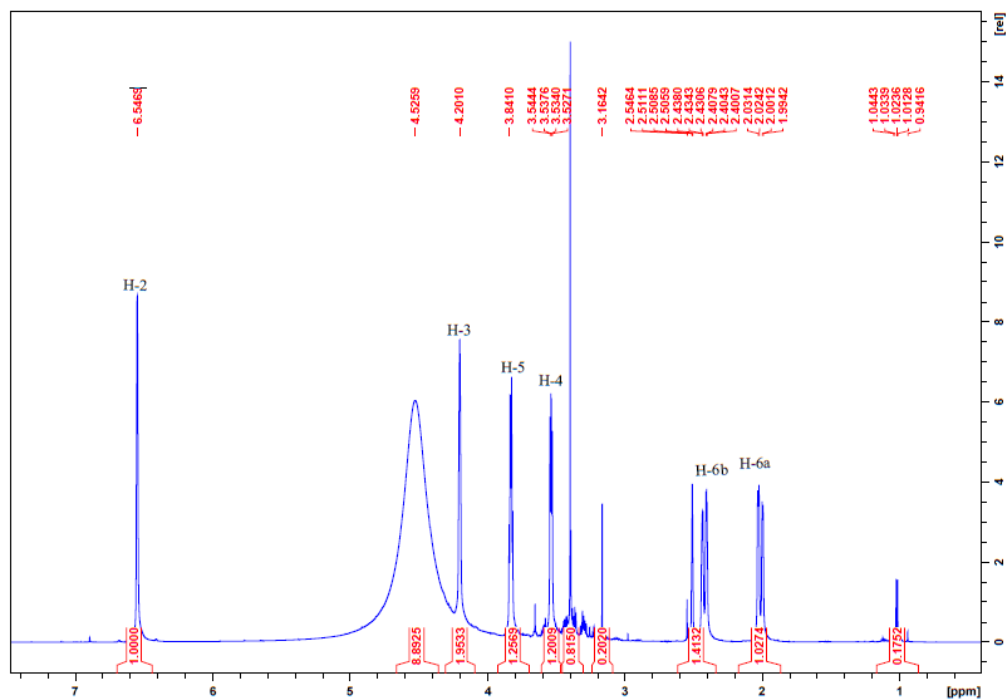

**Figure S8.**  $^1\text{H}$  nuclear magnetic resonance (NMR) spectrum (600 Hz, Deuterated dimethyl sulfoxide: DMSO- $\text{d}_6$ ) of Shikimic acid.

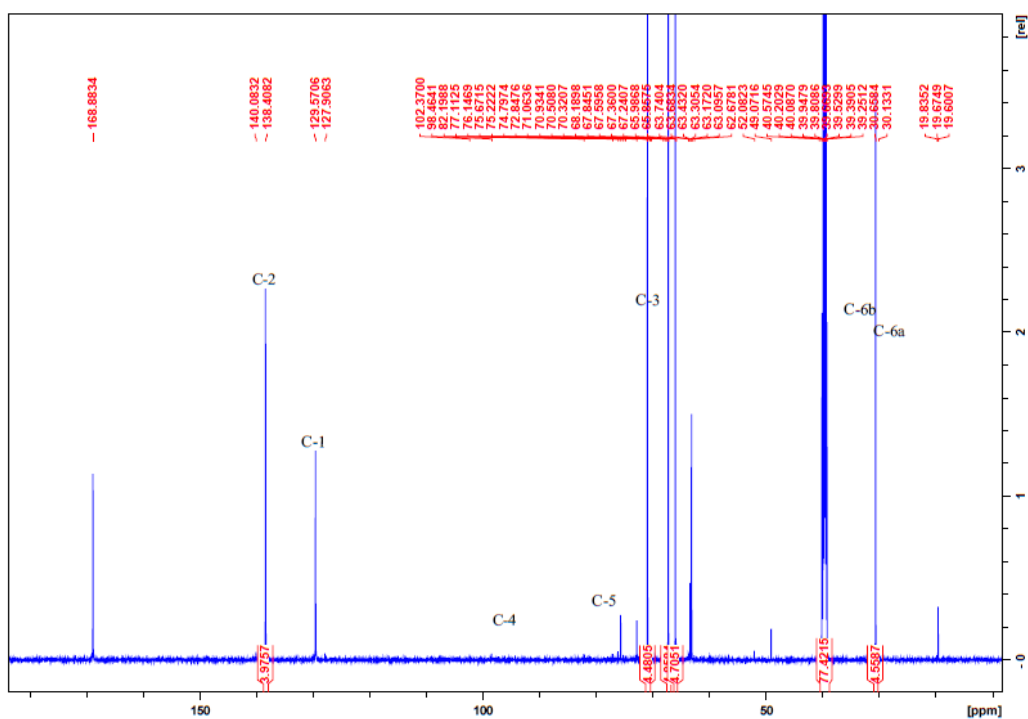

**Figure S9.**  $^{13}\text{C}$  nuclear magnetic resonance (NMR) spectrum (600 Hz, Deuterated dimethyl sulfoxide: DMSO- $\text{d}_6$ ) of Shikimic acid.

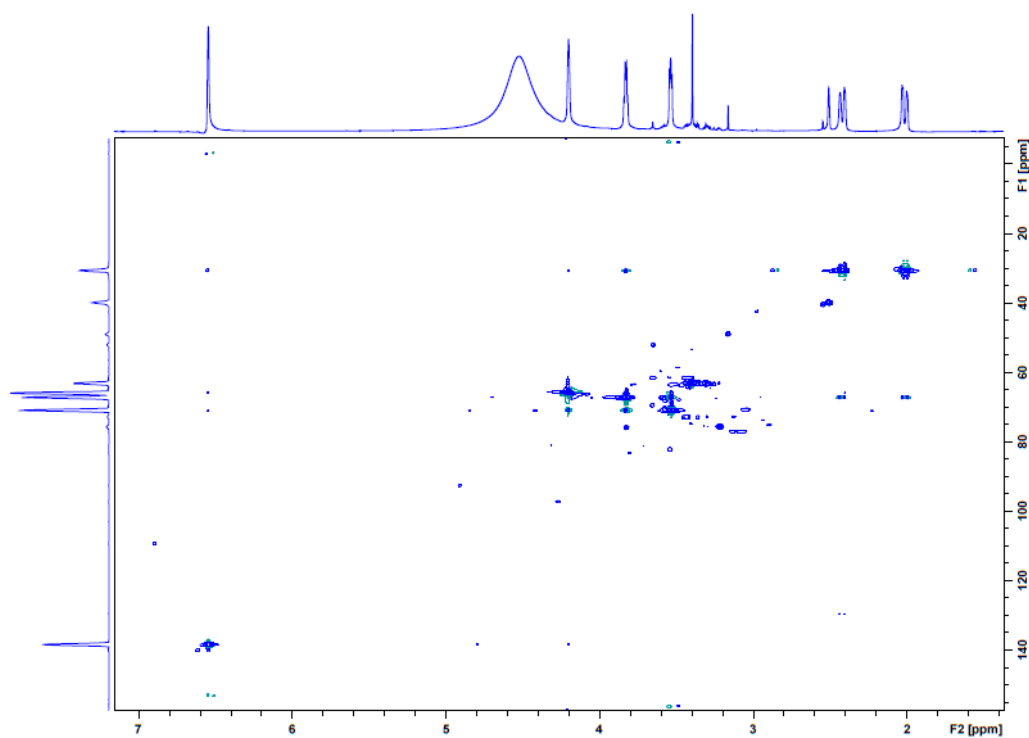

**Figure S10.** Two-dimensional nuclear magnetic resonance spectroscopy: heteronuclear single quantum correlation (HSQC) spectrum (600 Hz, Deuterated dimethyl sulfoxide: DMSO-d<sub>6</sub>) of Shikimic acid.

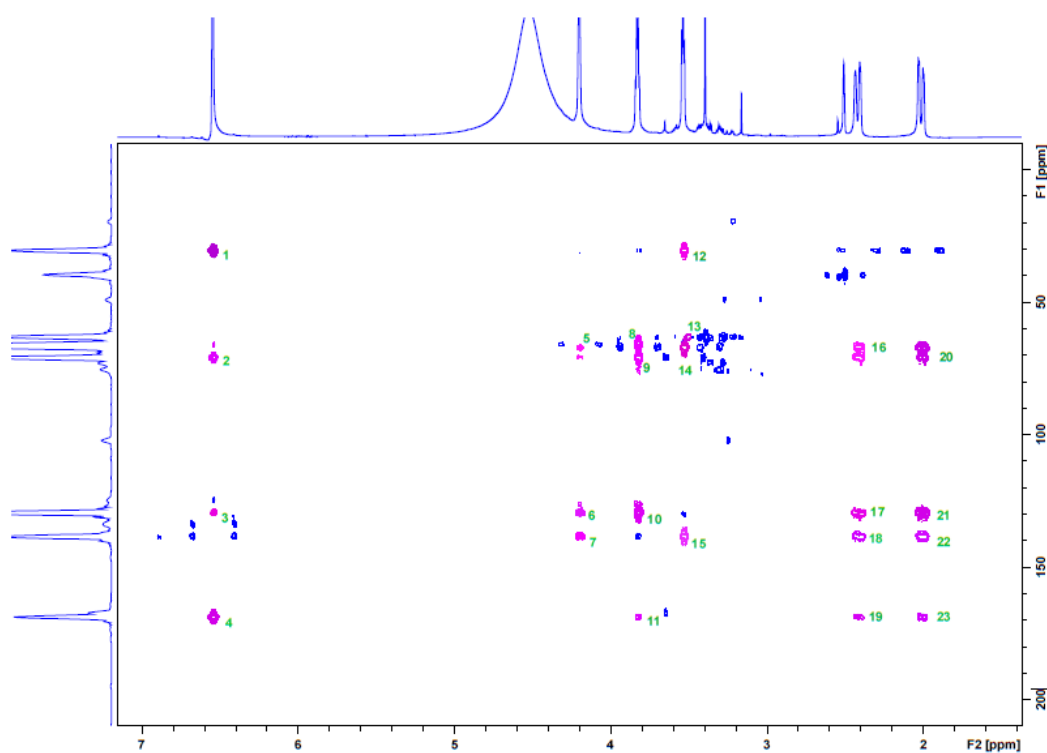

**Figure S11.** Two-dimensional nuclear magnetic resonance spectroscopy: heteronuclear multiple bond correlation (HMBC) spectrum (600 Hz, Deuterated dimethyl sulfoxide: DMSO-d<sub>6</sub>) of Shikimic acid.

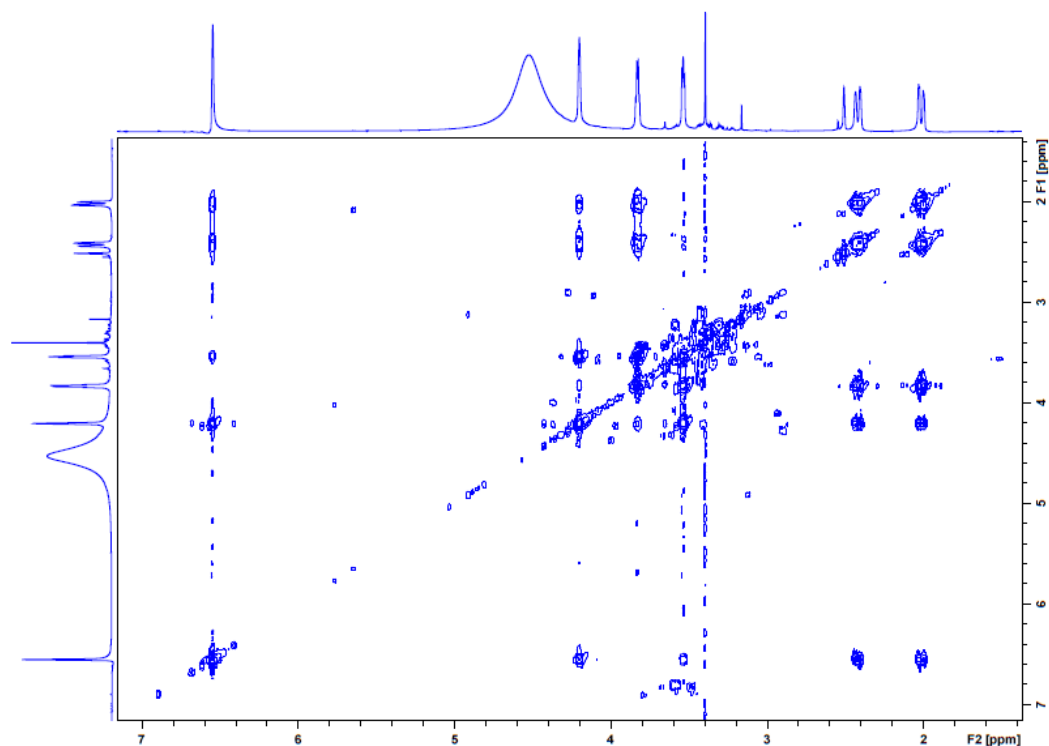

**Figure S12.** Two-dimensional nuclear magnetic resonance spectroscopy: correlated spectroscopy (COSY) spectrum (600 Hz, Deuterated dimethyl sulfoxide: DMSO-d<sub>6</sub>) of Shikimic acid.

## B) Mass spectra of Shikimic acid

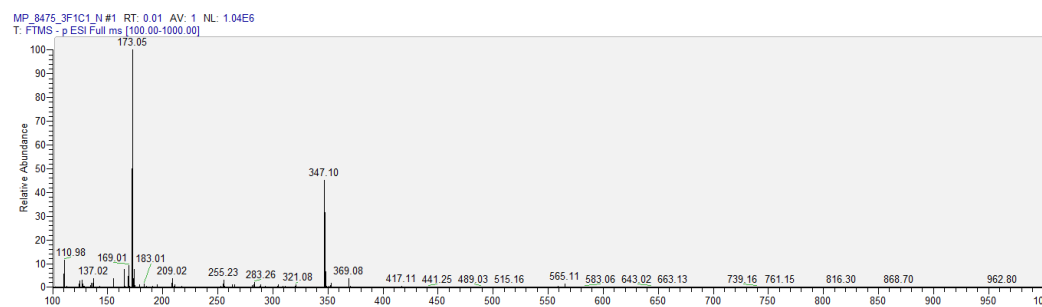

**Figure S13.** Mass spectrum (MS) in negative ion mode ( $m/z$  150–1000, scan rate of 0.5 Hz, voltage 2.0 kV) of Shikimic acid.
